# Supplementary material
Source: PubMed Central journal article supplement (PMC6160325)
Supplement: NIHMS965916-supplement-Supplemental.pdf [file NIHMS965916-supplement-Supplemental.pdf]

## Supplementary material

**Table 1** The slope, t-statistic, estimated degrees of freedom (DF), and associated FDR-corrected p-values for correlation between caudate and putamen volume loss and age (cf. Fig. 2). All correlations are significant at a significance level of 0.05.

|               | Normal Control |         |     |                        | Huntington's Disease |         |     |                        |
|---------------|----------------|---------|-----|------------------------|----------------------|---------|-----|------------------------|
|               | Slope          | t-Stat  | DF  | p-Value                | Slope                | t-Stat  | DF  | p-Value                |
| Left Caudate  | -9.2347        | -2.8497 | 216 | 4.7991e <sup>-3</sup>  | -63.6013             | -10.075 | 603 | 1.4442e <sup>-21</sup> |
| Right Caudate | -12.0076       | -3.6132 | 214 | 5.0257e <sup>-4</sup>  | -63.2369             | -9.9663 | 607 | 1.8083e <sup>-21</sup> |
| Left Putamen  | -30.8260       | -6.4565 | 211 | 1.4495e <sup>-9</sup>  | -49.6062             | -8.9647 | 603 | 3.8796e <sup>-18</sup> |
| Right Putamen | -29.0864       | -6.8354 | 215 | 3.3251e <sup>-10</sup> | -46.8855             | -9.1738 | 602 | 9.6031e <sup>-19</sup> |

**Table 2** The slope, t-statistic, estimated degrees of freedom (DF), and associated FDR-corrected p-values for correlation between isotropic volume fraction and age (cf. Fig. 3). \*In these regions, normal control or Huntington's disease groups show significant changes in isotropic volume fraction at a significance level of 0.05.

|         |       | Normal Control            |         |     |          | Huntington's Disease      |        |     |                        |
|---------|-------|---------------------------|---------|-----|----------|---------------------------|--------|-----|------------------------|
|         |       | Slope (10 <sup>-3</sup> ) | t-Stat  | DF  | p-Values | Slope (10 <sup>-3</sup> ) | t-Stat | DF  | p-Values               |
|         | Hand  | 0.4410                    | 1.6148  | 194 | 0.1728   | 1.3038                    | 6.4163 | 539 | 1.3002e <sup>-9*</sup> |
| Left    | Face  | 0.3571                    | 2.1778  | 210 | 0.0611   | 0.7133                    | 4.8499 | 575 | 2.3160e <sup>-6*</sup> |
| Caudate | Trunk | 0.3868                    | 1.4445  | 203 | 0.2184   | 0.7259                    | 3.2555 | 561 | 0.0013*                |
|         | Leg   | -0.0953                   | -0.2988 | 157 | 0.7655   | 0.7553                    | 3.7125 | 476 | 0.0003*                |
|         | Hand  | 0.5166                    | 4.3121  | 202 | 0.0004*  | 0.8653                    | 6.4029 | 555 | 1.3002e <sup>-9*</sup> |
| Left    | Face  | 0.4167                    | 2.3924  | 205 | 0.0470*  | 0.3687                    | 3.5611 | 558 | 0.0005*                |
| Putamen | Trunk | 0.0893                    | 1.0394  | 201 | 0.3691   | 0.6306                    | 5.3025 | 558 | 2.9310e <sup>-7*</sup> |
|         | Leg   | 0.3662                    | 2.5095  | 182 | 0.0415*  | 0.5750                    | 4.8706 | 524 | 2.3160e <sup>-6*</sup> |

|         |       |        |        |     |         |        |        |     |                         |
|---------|-------|--------|--------|-----|---------|--------|--------|-----|-------------------------|
|         | Hand  | 0.6344 | 2.2620 | 188 | 0.0568  | 1.1323 | 5.4890 | 496 | 1.2921e <sup>-7*</sup>  |
| Right   | Face  | 0.3077 | 1.8964 | 206 | 0.1054  | 0.8103 | 5.6908 | 573 | 5.3852e <sup>-8*</sup>  |
| Caudate | Trunk | 0.3650 | 1.2484 | 204 | 0.2844  | 0.7693 | 3.7406 | 555 | 0.0003*                 |
|         | Leg   | 0.1047 | 0.4490 | 194 | 0.6975  | 0.5340 | 3.1855 | 526 | 0.0015*                 |
|         | Hand  | 0.5069 | 3.4185 | 200 | 0.0041* | 0.9193 | 6.5131 | 546 | 1.3002e <sup>-9*</sup>  |
| Right   | Face  | 0.1388 | 0.6830 | 205 | 0.5662  | 0.7718 | 5.9120 | 578 | 1.8502e <sup>-8*</sup>  |
| Putamen | Trunk | 0.3968 | 3.0431 | 206 | 0.0106* | 0.7675 | 5.6617 | 561 | 5.4746e <sup>-8*</sup>  |
|         | Leg   | 0.6707 | 3.7390 | 205 | 0.0019* | 1.0549 | 6.8896 | 561 | 2.4118e <sup>-10*</sup> |

**Table 3** The intercept and slope with their t-statistic, estimated degrees of freedom (DF), and associated FDR-corrected p-values for correlation between isotropic volume fraction and the genetic load, CAG (cf. Fig. 5).

\*indicates significant correlations (FDR corrected p-value < 0.05).

|         |       | $\beta_0$ |         |     |          | $\beta_1$                 |         |     |          |
|---------|-------|-----------|---------|-----|----------|---------------------------|---------|-----|----------|
|         |       | Intercept | t-Stat  | DF  | P-Values | Slope (10 <sup>-3</sup> ) | t-Stat  | DF  | p-Values |
|         | Hand  | 0.0489    | 1.2676  | 538 | 0.3653   | -0.8964                   | -0.9734 | 538 | 0.4812   |
| Left    | Face  | 0.0420    | 1.6034  | 575 | 0.2334   | -0.8452                   | -1.3806 | 575 | 0.3704   |
| Caudate | Trunk | -0.0275   | -0.7290 | 561 | 0.6217   | 0.5862                    | 0.6585  | 561 | 0.6383   |
|         | Leg   | 0.06341   | 1.5716  | 472 | 0.2334   | -1.0428                   | -1.0868 | 472 | 0.4443   |
|         | Hand  | -0.0605   | -2.7329 | 556 | 0.0345*  | 1.7114                    | 3.2387  | 556 | 0.0068*  |
| Left    | Face  | -0.0454   | -2.3334 | 558 | 0.0639   | 1.2007                    | 2.5994  | 558 | 0.0307*  |
| Putamen | Trunk | -0.0155   | -0.7814 | 558 | 0.6217   | 0.5938                    | 1.2595  | 558 | 0.3704   |
|         | Leg   | 0.0079    | 0.3586  | 524 | 0.8229   | 0.0575                    | 0.1094  | 524 | 0.9738   |
|         | Hand  | -0.0130   | -0.3780 | 496 | 0.8229   | 0.5266                    | 0.6459  | 496 | 0.6383   |
| Right   | Face  | -0.0014   | -0.0503 | 574 | 0.9599   | 0.3392                    | 0.5299  | 574 | 0.6816   |
| Caudate | Trunk | -0.0387   | -1.1404 | 555 | 0.4074   | 1.1603                    | 1.4335  | 555 | 0.3704   |
|         | Leg   | 0.0512    | 1.6662  | 526 | 0.2334   | 0.9404                    | -1.2840 | 526 | 0.3704   |

|         |       |         |         |     |         |        |        |     |         |
|---------|-------|---------|---------|-----|---------|--------|--------|-----|---------|
|         | Hand  | -0.0633 | -3.0764 | 546 | 0.0176* | 1.7583 | 3.5795 | 546 | 0.0030* |
| Right   | Face  | 0.0017  | 0.0739  | 579 | 0.9599  | 0.0138 | 0.0247 | 579 | 0.9803  |
| Putamen | Trunk | -0.0505 | -2.3971 | 562 | 0.0639  | 1.3746 | 2.7283 | 562 | 0.0263* |
|         | Leg   | -0.0624 | -3.4471 | 561 | 0.0097  | 1.5809 | 3.7022 | 561 | 0.0030* |

**Table 4** The slope, t-statistic, estimated degrees of freedom (DF), and associated FDR-corrected p-values for correlation of isotropic volume fraction and clinical scores (total motor scores and diagnostic confidence level, cf. Fig. 6). Except for the connection from trunk to the caudate (colored in red), isotropic volume fractions in other regions are significantly correlated with total motor scores /diagnostic confidence level.

|         |       | Total Motor Scores  |        |     |                       | Diagnostic Confidence Level |        |     |                       |
|---------|-------|---------------------|--------|-----|-----------------------|-----------------------------|--------|-----|-----------------------|
|         |       | Slope ( $10^{-3}$ ) | t-Stat | DF  | p-Values              | Slope                       | t-Stat | DF  | p-Values              |
| Caudate | Hand  | 0.8886              | 4.7418 | 461 | 4.4355e <sup>-6</sup> | 0.0059                      | 3.5451 | 460 | 0.0009                |
|         | Face  | 0.6563              | 4.6976 | 552 | 4.4355e <sup>-6</sup> | 0.0041                      | 4.0057 | 552 | 0.0002                |
|         | Trunk | 0.8182              | 1.9485 | 521 | <b>0.0519</b>         | 0.0041                      | 2.1821 | 521 | 0.0296                |
|         | Leg   | 0.5393              | 2.6763 | 432 | 0.0088                | 0.0038                      | 2.6551 | 432 | 0.0094                |
| Putamen | Hand  | 0.6479              | 5.0405 | 527 | 1.2785e <sup>-6</sup> | 0.0039                      | 2.7872 | 526 | 0.0073                |
|         | Face  | 0.5353              | 6.1561 | 537 | 1.1525e <sup>-8</sup> | 0.0043                      | 5.4032 | 539 | 3.9358e <sup>-7</sup> |
|         | Trunk | 0.4044              | 5.1996 | 539 | 7.5747e <sup>-7</sup> | 0.0021                      | 3.4316 | 537 | 0.0010                |
|         | Leg   | 0.5330              | 6.0492 | 493 | 1.1528e <sup>-8</sup> | 0.0042                      | 5.8373 | 495 | 7.6851e <sup>-8</sup> |
